# Supplementary material
Source: PubMed Central journal article supplement (PMC6016091)
Supplement: Supp_Data.pdf [file Supp_Data.pdf]

# Supplementary Data

## Supplementary Appendix SA1

### Genderqueer Health Interview Protocol

#### *Part 1: Establishing rapport/background information*

1. Let's start with talking about identities. Can you tell me a little bit about your pronouns and gender identity, and how you came to identify this way?

#### *Part 2: Health experience/healthcare access*

1. We've talked about your identities and some of the experiences that come along with being within the genderqueer and nonbinary spectrum. Now I'd like to talk to you about your experiences with healthcare. Do you currently access any sort of health service?

2. Do you currently access any sort of health service that is gender-related?

If participant is unsure of "gender-related care", prompt with: and by gender-related care, it can be anything from surgeries or hormones, or support groups and other types of care. It is however you define "gender-related".

If participant does not access health services for gender-related care, prompt with: have you ever thought about accessing health services for gender-related care?

3. Thinking back on the last time you went to a healthcare setting, how was that experience?
4. At any time in the past, can you tell me about a particularly good healthcare experience you've had?
5. At any time in the past, can you tell me about a particularly bad healthcare experience you've had?

#### *Part 3: Healthcare barriers*

1. Can you tell me a little bit about the first time you accessed healthcare for gender-related services?

If participant has not accessed healthcare for gender-related services but is thinking about accessing, prompt with: What do you think your first experience with reaching out to health services for gender-related care might be like?

2. What were some of the gender-related care services that you accessed?
3. Did you face any barriers when accessing (or thinking about accessing) healthcare?  
If yes, did facing those barriers affect your decisions on accessing healthcare?  
If no, were you worried that you might face barriers?
4. Can you speak a little bit about the role that insurance plays in how you access doctors and gender-related services?

#### *Part 4: Healthcare improvements*

1. What are some of the ways that health services can improve when considering your gender identity?
2. How might your identity differ from transgender people who want/need to "fully transition"? Meaning, individuals who seek medical procedures (like hormones or surgeries) and identify as completely male or completely female?  
If there are differences between yourself and transgender people who want/need to "fully transition," what are some of the ways that healthcare providers can acknowledge those differences?

#### *Part 5: Wrap-up*

1. We've talked a lot about the healthcare system and how that affects the way you interact with doctors, clinics, etc. Does anything else come to mind when you think about your gender identity and the health industry?
